# Supplementary material for: Crystallization of Isotactic Polypropylene Nanocomposites with Fibrillated Poly(tetrafluoroethylene) under Elevated Pressure
Source: MDPI journal article supplement (doi:10.3390/polym14010088), 2021-12-27
Supplement: s1 [file s1]

## Supplementary Information

### Crystallization of isotactic polypropylene nanocomposites with fibrillated poly(tetrafluoroethylene) under elevated pressure

Przemysław Sowinski \*, Sivanjineyulu Veluri, Ewa Piorkowska \*

Centre of Molecular and Macromolecular Studies, Polish Academy of Sciences, Sienkiewicza 112, 90-363 Lodz, Poland; sveluri@cbmm.lodz.pl

\* Correspondence: przem\_so@cbmm.lodz.pl (P.S.); epiorkow@cbmm.lodz.pl (E.P.); Tel.: +48-42-6803316 (P.S.)

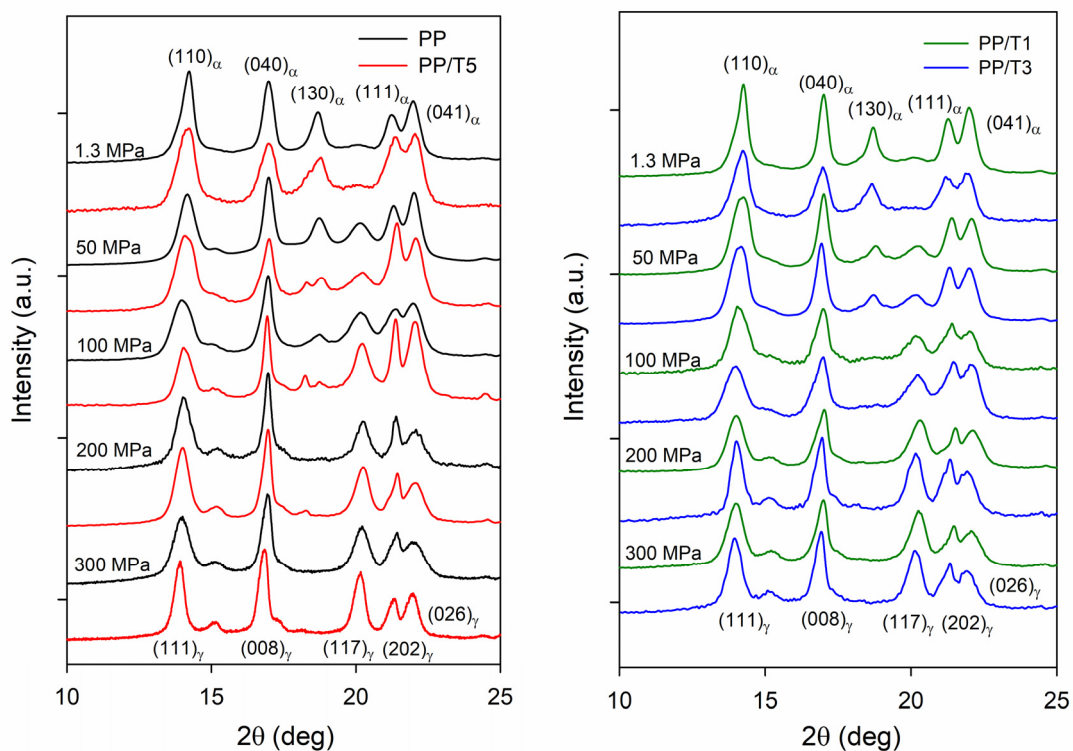

**Figure S1.** WAXD diffractograms of PP and PP/T nanocomposites crystallized during cooling under various pressures.

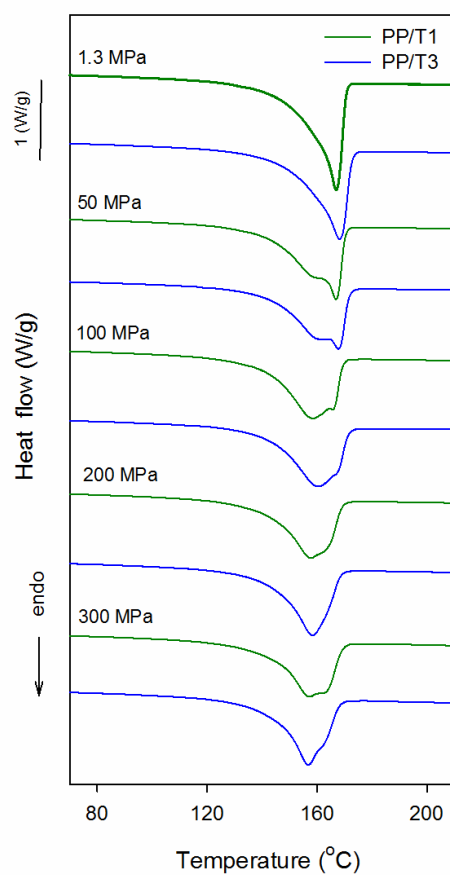

**Figure S2.** DSC heating thermograms of PP/T1 and PP/T3 nanocomposites crystallized during cooling under various pressures, recorded at 10 °C/min.
